# Supplementary material
Source: PubMed Central journal article supplement (PMC7039306)

# PROTEOMICS

**Supporting Information  
for Proteomics – Clinical Applications  
DOI 10.1002/prca.201000110**

Nuntawan Piyaphanee, Qing Ma, Oran Kremen, Kimberly Czech,  
Kenneth Greis, Mark Mitsnefes, Prasad Devarajan  
and Michael R. Bennett

**Discovery and initial validation of  $\alpha$  1-B glycoprotein fragmentation as a  
differential urinary biomarker in pediatric steroid-resistant nephrotic syndrome**

## Protein Identification of the 13.8kDa peak by tandem mass spectrometry.

### Band of interest for protein identification

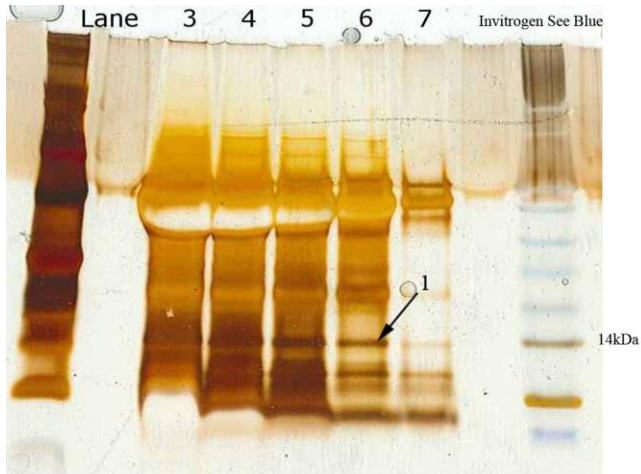

### Mascot Search Parameters

Type of search : Sequence Query  
Enzyme : Trypsin  
Fixed modifications : Carbamidomethyl (C)  
Variable modifications : Deamidated (NQ), Oxidation (M)  
Mass values : Monoisotopic  
Protein Mass : Unrestricted  
Peptide Mass Tolerance :  $\pm 25$  ppm  
Fragment Mass Tolerance :  $\pm 0.25$  Da  
Max Missed Cleavages : 2  
Instrument type : MALDI-TOF-TOF

Protein hits at  $p < 0.005$  : [gi|69990](#) alpha-1-B-glycoprotein - human  
[gi|219978](#) prealbumin [Homo sapiens]  
[gi|28590](#) unnamed protein product [Homo sapiens]  
[gi|4504893](#) kininogen-1 isoform 2 [Homo sapiens]

1. [gi|69990](#) Mass: 52479 Score: 273 Queries matched: 3  
alpha-1-B-glycoprotein - human

| Query | Observed | Mr(expt) | Mr(calc) | ppm | Miss | Score | Expect | Rank | Peptide |
|-------|----------|----------|----------|-----|------|-------|--------|------|---------|
|-------|----------|----------|----------|-----|------|-------|--------|------|---------|

|   |                    |           |           |           |       |   |     |         |   |                                        |
|---|--------------------|-----------|-----------|-----------|-------|---|-----|---------|---|----------------------------------------|
| ✓ | <a href="#">29</a> | 1264.6481 | 1263.6408 | 1263.6459 | -4.03 | 0 | 83  | 2.8e-06 | 1 | R.SGLSTGWTQLSK.L                       |
| ✓ | <a href="#">39</a> | 1372.6962 | 1371.6889 | 1371.6895 | -0.44 | 0 | 79  | 4e-06   | 1 | K.HQFLLTGDTQGR.Y                       |
| ✓ | <a href="#">65</a> | 1675.8656 | 1674.8583 | 1674.8577 | 0.38  | 0 | 111 | 3.6e-09 | 1 | K.NGVAQEPVHLDSPAIK.H + Deamidated (NQ) |

```

1 AIFYETQPSL WAESESLKLP LANVTLTQCA RLETPDFQLF KNGVAQEPVH
51 LDSPAIKHQF LLTGDTQGRY RCRSGLSTGW TQLSKLLELT GPKSLPAPWL
101 SMAPVSWITP GLKTTAVCRG VLRGVTFLLR REGDHEFLEV PEAQEDVEAT
151 FPVHQPGNYS CSYRTDGEGA LSEPSATVTI EELAAPPPPV LMHHGESSQV
201 LHPGNKVTLT CVAPLSGVDF QLRRGEKELL VPRSSTSPDR IFFHLNAVAL
251 GDGGHYTCRY RLHDNQNGWS GDSAPVELIL SDETLPAPEF SPEPESGRAL
301 RLRCLAPLEG ARFALVREDR GGRRVHRFQS PAGTEALFEL HNISVADSAN
351 YSCVYVDLKP PFGGSAPSER LELHVDGPPP RPQLRATWSG AVLAGRDAVL
401 RCEGPIPDVT FELLREGETK AVKTVRTPGA AANLELIFVG PQHAGNYRCR
451 YRSWVPHTFE SELSDPVELL VAES

```

### MS/MS Profile for 1675.9

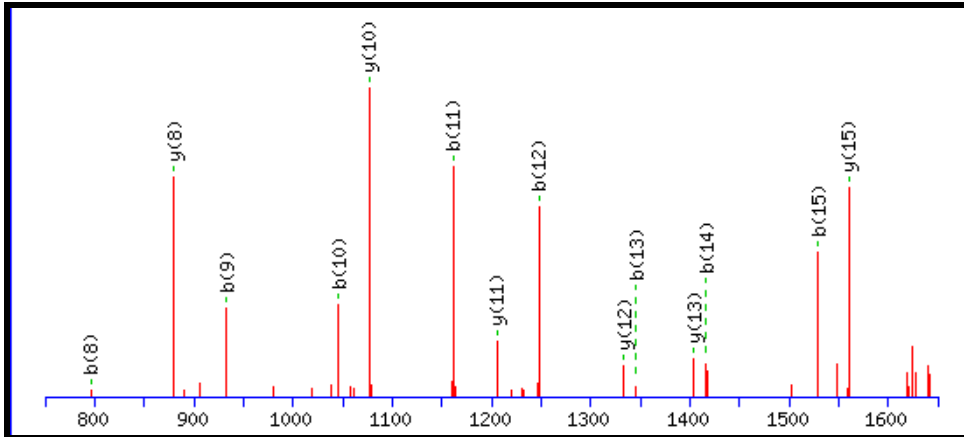

2. [gi|219978](#) Mass: 16023 Score: 175 Queries matched: 2  
 prealbumin [Homo sapiens]

| Query                                                  | Observed  | Mr(expt)  | Mr(calc)  | ppm   | Miss | Score | Expect  | Rank | Peptide            |
|--------------------------------------------------------|-----------|-----------|-----------|-------|------|-------|---------|------|--------------------|
| <input checked="" type="checkbox"/> <a href="#">41</a> | 1394.6208 | 1393.6135 | 1393.6150 | -1.06 | 0    | 81    | 1.5e-06 | 1    | K.AADDTWEPFASGK.T  |
| <input checked="" type="checkbox"/> <a href="#">50</a> | 1522.7173 | 1521.7100 | 1521.7100 | 0.04  | 1    | 94    | 1.2e-07 | 1    | R.KAADDTWEPFASGK.T |

1 MASHRLLLLC LAGLVFVSEA GPTGTGESKC PLMVKVLDAV RGSPAINVAM  
 51 HVFR**KAADDT WEPFASGK**Ts ESGELHGLTT EEEFVEGIYK VEIDTKSYWK  
 101 ALGISPFHEH AEVVFTANDS GPRRYTIAAL LSPYSYSTTA VVTNPKE

### MS/MS Profile for 1394.6

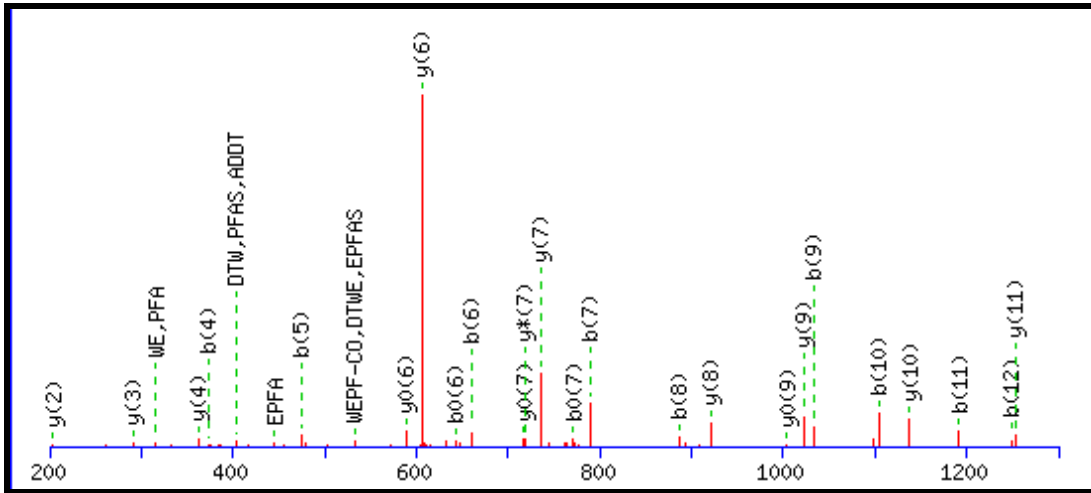

3. [gi|28592](#) Mass: 71316 Score: 109 Queries matched: 4  
 serum albumin [Homo sapiens]

| Query                                                  | Observed  | Mr(expt)  | Mr(calc)  | ppm   | Miss | Score | Expect | Rank | Peptide                                        |
|--------------------------------------------------------|-----------|-----------|-----------|-------|------|-------|--------|------|------------------------------------------------|
| <input checked="" type="checkbox"/> <a href="#">1</a>  | 927.4958  | 926.4885  | 926.4861  | 2.58  | 0    | 31    | 0.13   | 1    | K.YLYE <del>I</del> AR.R                       |
| <input checked="" type="checkbox"/> <a href="#">45</a> | 1467.8420 | 1466.8347 | 1466.8358 | -0.71 | 1    | 38    | 0.023  | 1    | R.RHPDYSV <del>V</del> LLLR.L                  |
| <input checked="" type="checkbox"/> <a href="#">57</a> | 1623.7927 | 1622.7854 | 1622.7803 | 3.16  | 0    | 40    | 0.036  | 1    | K.DVFLGMFLYE <del>A</del> AR.R                 |
| <input checked="" type="checkbox"/> <a href="#">60</a> | 1639.7795 | 1638.7722 | 1638.7752 | -1.82 | 0    | (13)  | 17     | 1    | K.DVFLGMFLYE <del>A</del> AR.R + Oxidation (M) |

```

1 MKWVTFISLL FLFSSAYSRG VFRRDAHKSE VAHRFKDLGE ENFKALVLIA
51 FAQYLQQCPF EDHVKLVNEV TEFAKTCVAD ESAENC DKSL HTLFGDKLCT
101 VATLRETYGE MADCCAQEP ERNECFLQHK DDNP NL PRLV RPEVDVMCTA
151 FHDNEETFLK KYLYEIARRH PYFYAPELLF FAKRYKAAFT ECCQAADKAA
201 CLLPKLDELR DEGKASSAQ RLKCASLQKF GERAFKAWAV ARLSQRFPKA
251 EFAEVSKLVT DLTKVHTECC HGDLLECADD RADLAKYICE NQDSISSKLK
301 ECCEKPLLEK SHCIAEVEND EMPADLPSLA ADFVESKDVC KNYAEAKDVF
351 LGMFLYEAAR RHPDYSVVLL LRLAKTYETT LEKCCAAADP HECYAKVFDE
401 FKPLVEEPQN LIKQNCELFK QLGEYKFQNA LLVRYTKKVP QVSTPTLVEV
451 SRNLGKVGSK CCKHPEAKRM PCAEDYLSVV LNQLCVLHEK TPVSDRVTKC
501 CTESLVNRRP CFSALEVDET YVPKEFNAET FTFHADICTL SEKERQIKKQ
551 TALVELVKHK PKATKEQLKA VMDDFAAFVE KCCKADDKET CFAEEGKKLV
601 AASQAALGL
  
```

### MS/MS Profile for 1467.8

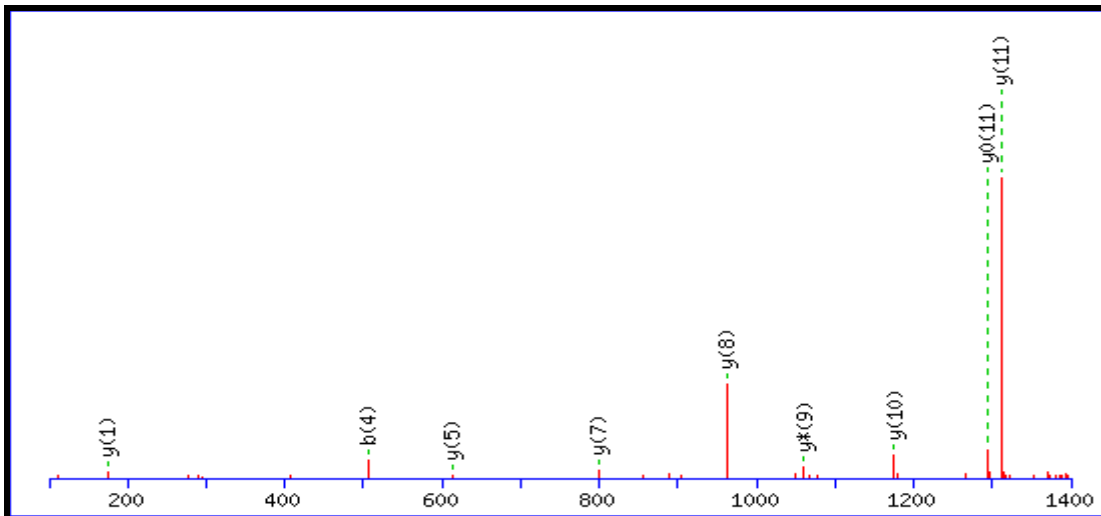

4. [gi|4504893](#) Mass: 48936 Score: 102 Queries matched: 2  
 kininogen-1 isoform 2 [Homo sapiens]

| Query                                                  | Observed  | Mr(expt)  | Mr(calc)  | ppm  | Miss | Score | Expect  | Rank | Peptide                              |
|--------------------------------------------------------|-----------|-----------|-----------|------|------|-------|---------|------|--------------------------------------|
| <input checked="" type="checkbox"/> <a href="#">48</a> | 1514.6633 | 1513.6560 | 1513.6507 | 3.50 | 1    | 37    | 0.028   | 1    | K.TWQDCEYKDAAK.A                     |
| <input checked="" type="checkbox"/> <a href="#">70</a> | 1875.8988 | 1874.8915 | 1874.8547 | 19.6 | 0    | 65    | 0.00012 | 1    | K.YNSQNSNNQFVLYR.I + Deamidated (NQ) |

```

1 MKLITILFLC SRLLLSLTQE SQSEEIDCND KDLFKAVDAA LKKYNSQNS
51 NNQFVLYRIT EATKTVGSDT FYSFKYEIKE GDCPVQSGKT WQDCEYKDA
101 KAATGECTAT VGKRSSTKFS VATQTCQITP AEGPVVTAQY DCLGCVHPIS
151 TQSPDLEPIL RHGIQYFNNN TQHSSLFMLN EVKRAQRQVV AGLNFRITYS
201 IVQTNCSEKEN FLFLTPDCKS LWNGDTGECT DNAYIDIQLR IASFSQNCDI
251 YPGKDFVQPP TKICVGCPRD IPTNSPELEE TLTHTITKLN AENNATFYFK
301 IDNVKKARVQ VVAGKKYFID FVARETTCSK ESNEELTESC ETKKLQSLD
351 CNAEVYVVPW EKKIYPTVNC QPLGMISLMK RPPGFSPFRS SRIGEIKEET
401 TSHLRSCCEYK GRPPKAGAEP ASEREVS
  
```

### MS/MS profile for 1875.9

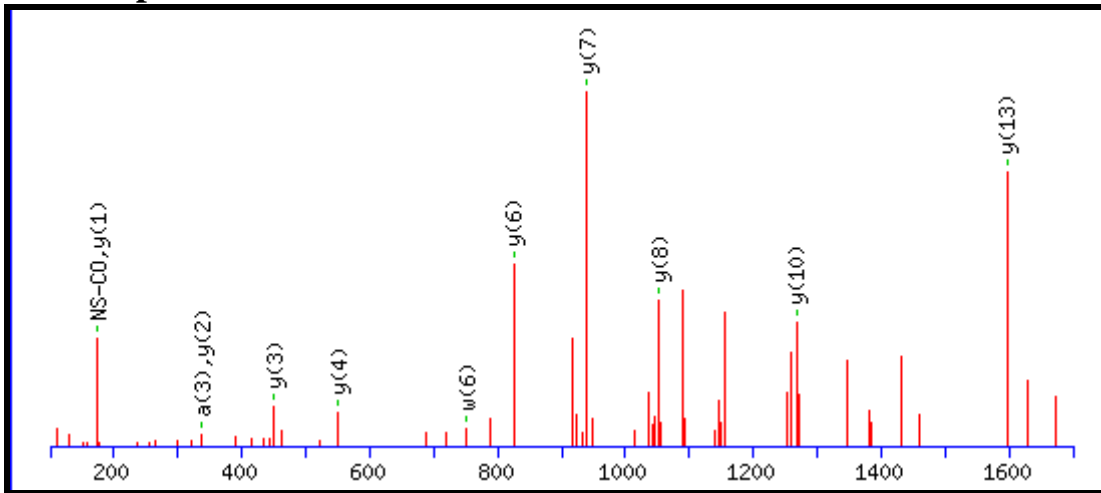

Supplement: NIHMS1554349-supplement-Supp_Data.pdf [file NIHMS1554349-supplement-Supp_Data.pdf]
